# Supplementary material for: Green Flame Retardancy: Biomass-Based Treatment for Poplar Wood
Source: Research Square preprint supplement (doi:10.21203/rs.3.rs-8327322/v1), 2025-12-17
Supplement: Supplementary file 1 [file bcb70ee1692826a755838831.docx]

**Supplementary material A: Duncan´s multiple range test coefficients for data presented in the Table 5 (in the main manuscript text)**

This supplementary section provides the full pairwise comparison results of Duncan’s multiple range test (α = 0.05) for all investigated wood materials, including raw wood (RW), furfuryl alcohol-treated wood (FA-W), ammonium phytate-treated wood (AMP-W), and the combined furfuryl alcohol and ammonium phytate treatment (FA+AMP-W), assessed in both non-leached (NL) and leached (L) conditions. Complete Duncan groupings are presented for each measured fire-performance parameter: time to ignition (TTI), maximum average rate of heat emission (MARHE), maximum heat release rate (HRRmax), total heat release (THR), effective heat of combustion (EHC), residual mass (RM), total smoke production (TSP), total carbon monoxide production (TCOP), and carbon monoxide yield (COY). Value of Duncan´s test higher than 0.05 indicate statistically significant difference. These results complement the graphical letter-coded significance indicators shown in the main text and were generated using StatSoft Statistica 10.

**Table A. 1** Duncan´s coefficients for TTI

|  | **RW-NL** | **RW-L** | **AMP-W-NL** | **AMP-W-L** | **FA-W-NL** | **FA-W-L** | **FA+AMP-W-NL** | **FA+AMP-W-L** |
| --- | --- | --- | --- | --- | --- | --- | --- | --- |
| **RW-NL** |  |  | 0.612661 | 0.79076 | 0.778889 | 0.029604 | 0.575787 | 0.429115 |
| **RW-L** | 0.796869 |  | 0.778889 | 1 | 1 | 0.021659 | 0.449708 | 0.321719 |
| **AMP-W-NL** | 0.612661 | 0.778889 |  | 0.79076 | 0.796869 | 0.013373 | 0.321719 | 0.222781 |
| **AMP-W-L** | 0.79076 | 1 | 0.79076 |  | 1 | 0.020468 | 0.442256 | 0.316781 |
| **FA-W-NL** | 0.778889 | 1 | 0.796869 | 1 |  | 0.018985 | 0.429115 | 0.308652 |
| **FA-W-L** | 0.029604 | 0.021659 | 0.013373 | 0.020468 | 0.018985 |  | 0.075039 | 0.105924 |
| **FA+AMP-W-NL** | 0.575787 | 0.449708 | 0.321719 | 0.442256 | 0.429115 | 0.075039 |  | 0.778889 |
| **FA+AMP-W-L** | 0.429115 | 0.321719 | 0.222781 | 0.316781 | 0.308652 | 0.105924 | 0.778889 |  |

**Table A. 2** Duncan´s coefficients for MARHE

|  | **RW-NL** | **RW-L** | **AMP-W-NL** | **AMP-W-L** | **FA-W-NL** | **FA-W-L** | **FA+AMP-W-NL** | **FA+AMP-W-L** |
| --- | --- | --- | --- | --- | --- | --- | --- | --- |
| **RW-NL** |  | 0.807613 | 0.000066 | 0.021661 | 0.415188 | 0.502616 | 0.000037 | 0.009457 |
| **RW-L** | 0.807613 |  | 0.000039 | 0.016636 | 0.540003 | 0.639779 | 0.000034 | 0.006788 |
| **AMP-W-NL** | 0.000066 | 0.000039 |  | 0.000780 | 0.000028 | 0.000034 | 0.531118 | 0.001742 |
| **AMP-W-L** | 0.021661 | 0.016636 | 0.000780 |  | 0.005895 | 0.007532 | 0.000292 | 0.604011 |
| **FA-W-NL** | 0.415188 | 0.540003 | 0.000028 | 0.005895 |  | 0.855803 | 0.000025 | 0.002280 |
| **FA-W-L** | 0.502616 | 0.639779 | 0.000034 | 0.007532 | 0.855803 |  | 0.000028 | 0.002970 |
| **FA+AMP-W-NL** | 0.000037 | 0.000034 | 0.531118 | 0.000292 | 0.000025 | 0.000028 |  | 0.000631 |
| **FA+AMP-W-L** | 0.009457 | 0.006788 | 0.001742 | 0.604011 | 0.002280 | 0.002970 | 0.000631 |  |

**Table A. 3** Duncan´s coefficients for HRRmax

|  | **RW-NL** | **RW-L** | **AMP-W-NL** | **AMP-W-L** | **FA-W-NL** | **FA-W-L** | **FA+AMP-W-NL** | **FA+AMP-W-L** |
| --- | --- | --- | --- | --- | --- | --- | --- | --- |
| **RW-NL** |  | 0.307982 | 0.000384 | 0.128932 | 0.769724 | 0.638091 | 0.000377 | 0.298810 |
| **RW-L** | 0.307982 |  | 0.002344 | 0.542153 | 0.434738 | 0.160876 | 0.002492 | 0.991390 |
| **AMP-W-NL** | 0.000384 | 0.002344 |  | 0.006468 | 0.000605 | 0.000180 | 0.953639 | 0.002744 |
| **AMP-W-L** | 0.128932 | 0.542153 | 0.006468 |  | 0.194505 | 0.061158 | 0.007366 | 0.557044 |
| **FA-W-NL** | 0.769724 | 0.434738 | 0.000605 | 0.194505 |  | 0.472508 | 0.000601 | 0.415947 |
| **FA-W-L** | 0.638091 | 0.160876 | 0.000180 | 0.061158 | 0.472508 |  | 0.000172 | 0.156349 |
| **FA+AMP-W-NL** | 0.000377 | 0.002492 | 0.953639 | 0.007366 | 0.000601 | 0.000172 |  | 0.002783 |
| **FA+AMP-W-L** | 0.298810 | 0.991390 | 0.002744 | 0.557044 | 0.415947 | 0.156349 | 0.002783 |  |

**Table A. 4** Duncan´s coefficients for THR

|  | **RW-NL** | **RW-L** | **AMP-W-NL** | **AMP-W-L** | **FA-W-NL** | **FA-W-L** | **FA+AMP-W-NL** | **FA+AMP-W-L** |
| --- | --- | --- | --- | --- | --- | --- | --- | --- |
| **RW-NL** |  | 0.403271 | 0.000449 | 0.009599 | 0.104652 | 0.938441 | 0.000033 | 0.000036 |
| **RW-L** | 0.403271 |  | 0.000117 | 0.002019 | 0.356257 | 0.387935 | 0.000027 | 0.000033 |
| **AMP-W-NL** | 0.000449 | 0.000117 |  | 0.120373 | 0.000047 | 0.000443 | 0.000122 | 0.005694 |
| **AMP-W-L** | 0.009599 | 0.002019 | 0.120373 |  | 0.000365 | 0.008807 | 0.000063 | 0.000314 |
| **FA-W-NL** | 0.104652 | 0.356257 | 0.000047 | 0.000365 |  | 0.100359 | 0.000025 | 0.000027 |
| **FA-W-L** | 0.938441 | 0.387935 | 0.000443 | 0.008807 | 0.100359 |  | 0.000036 | 0.000062 |
| **FA+AMP-W-NL** | 0.000033 | 0.000027 | 0.000122 | 0.000063 | 0.000025 | 0.000036 |  | 0.024598 |
| **FA+AMP-W-L** | 0.000036 | 0.000033 | 0.005694 | 0.000314 | 0.000027 | 0.000062 | 0.024598 |  |

**Table A. 5** Duncan´s coefficients for EHC

|  | **RW-NL** | **RW-L** | **AMP-W-NL** | **AMP-W-L** | **FA-W-NL** | **FA-W-L** | **FA+AMP-W-NL** | **FA+AMP-W-L** |
| --- | --- | --- | --- | --- | --- | --- | --- | --- |
| **RW-NL** |  | 0.857175 | 0.038557 | 0.063598 | 0.888797 | 0.065683 | 0.000033 | 0.000085 |
| **RW-L** | 0.857175 |  | 0.031474 | 0.054214 | 0.959555 | 0.061660 | 0.000025 | 0.000072 |
| **AMP-W-NL** | 0.038557 | 0.031474 |  | 0.740081 | 0.032395 | 0.674106 | 0.000109 | 0.003926 |
| **AMP-W-L** | 0.063598 | 0.054214 | 0.740081 |  | 0.055043 | 0.909703 | 0.000081 | 0.002548 |
| **FA-W-NL** | 0.888797 | 0.959555 | 0.032395 | 0.055043 |  | 0.060574 | 0.000027 | 0.000075 |
| **FA-W-L** | 0.065683 | 0.061660 | 0.674106 | 0.909703 | 0.060574 |  | 0.000054 | 0.002420 |
| **FA+AMP-W-NL** | 0.000033 | 0.000025 | 0.000109 | 0.000081 | 0.000027 | 0.000054 |  | 0.024462 |
| **FA+AMP-W-L** | 0.000085 | 0.000072 | 0.003926 | 0.002548 | 0.000075 | 0.002420 | 0.024462 |  |

**Table A. 6** Duncan´s coefficients for RM

|  | **RW-NL** | **RW-L** | **AMP-W-NL** | **AMP-W-L** | **FA-W-NL** | **FA-W-L** | **FA+AMP-W-NL** | **FA+AMP-W-L** |
| --- | --- | --- | --- | --- | --- | --- | --- | --- |
| **RW-NL** |  | 0.695249 | 0.000036 | 0.000159 | 0.000062 | 0.000084 | 0.000027 | 0.000033 |
| **RW-L** | 0.695249 |  | 0.000033 | 0.000084 | 0.000036 | 0.000062 | 0.000025 | 0.000027 |
| **AMP-W-NL** | 0.000036 | 0.000033 |  | 0.000062 | 0.212369 | 0.001756 | 0.000084 | 0.000159 |
| **AMP-W-L** | 0.000159 | 0.000084 | 0.000062 |  | 0.000084 | 0.000228 | 0.000033 | 0.000036 |
| **FA-W-NL** | 0.000062 | 0.000036 | 0.212369 | 0.000084 |  | 0.019218 | 0.000062 | 0.000084 |
| **FA-W-L** | 0.000084 | 0.000062 | 0.001756 | 0.000228 | 0.019218 |  | 0.000036 | 0.000062 |
| **FA+AMP-W-NL** | 0.000027 | 0.000025 | 0.000084 | 0.000033 | 0.000062 | 0.000036 |  | 0.024688 |
| **FA+AMP-W-L** | 0.000033 | 0.000027 | 0.000159 | 0.000036 | 0.000084 | 0.000062 | 0.024688 |  |

**Table A. 7** Duncan´s coefficients for TSP

|  | **RW-NL** | **RW-L** | **AMP-W-NL** | **AMP-W-L** | **FA-W-NL** | **FA-W-L** | **FA+AMP-W-NL** | **FA+AMP-W-L** |
| --- | --- | --- | --- | --- | --- | --- | --- | --- |
| **RW-NL** |  | 0.338245 | 0.000033 | 0.058013 | 0.047248 | 0.716013 | 0.000027 | 0.000025 |
| **RW-L** | 0.338245 |  | 0.000062 | 0.262110 | 0.228149 | 0.511458 | 0.000036 | 0.000033 |
| **AMP-W-NL** | 0.000033 | 0.000062 |  | 0.000090 | 0.000165 | 0.000036 | 0.016444 | 0.017405 |
| **AMP-W-L** | 0.058013 | 0.262110 | 0.000090 |  | 0.876012 | 0.100206 | 0.000062 | 0.000036 |
| **FA-W-NL** | 0.047248 | 0.228149 | 0.000165 | 0.876012 |  | 0.083984 | 0.000084 | 0.000062 |
| **FA-W-L** | 0.716013 | 0.511458 | 0.000036 | 0.100206 | 0.083984 |  | 0.000033 | 0.000027 |
| **FA+AMP-W-NL** | 0.000027 | 0.000036 | 0.016444 | 0.000062 | 0.000084 | 0.000033 |  | 0.930976 |
| **FA+AMP-W-L** | 0.000025 | 0.000033 | 0.017405 | 0.000036 | 0.000062 | 0.000027 | 0.930976 |  |

**Table A. 8** Duncan´s coefficients for TCOP

|  | **RW-NL** | **RW-L** | **AMP-W-NL** | **AMP-W-L** | **FA-W-NL** | **FA-W-L** | **FA+AMP-W-NL** | **FA+AMP-W-L** |
| --- | --- | --- | --- | --- | --- | --- | --- | --- |
| **RW-NL** |  | 0.015917 | 0.000026 | 0.000035 | 0.000038 | 0.000029 | 0.000381 | 0.000133 |
| **RW-L** | 0.015917 |  | 0.000249 | 0.000521 | 0.000680 | 0.000471 | 0.060283 | 0.014865 |
| **AMP-W-NL** | 0.000026 | 0.000249 |  | 0.635526 | 0.521765 | 0.695529 | 0.011196 | 0.048746 |
| **AMP-W-L** | 0.000035 | 0.000521 | 0.635526 |  | 0.842737 | 0.912062 | 0.024837 | 0.100101 |
| **FA-W-NL** | 0.000038 | 0.000680 | 0.521765 | 0.842737 |  | 0.770487 | 0.031880 | 0.122064 |
| **FA-W-L** | 0.000029 | 0.000471 | 0.695529 | 0.912062 | 0.770487 |  | 0.022126 | 0.090772 |
| **FA+AMP-W-NL** | 0.000381 | 0.060283 | 0.011196 | 0.024837 | 0.031880 | 0.022126 |  | 0.419563 |
| **FA+AMP-W-L** | 0.000133 | 0.014865 | 0.048746 | 0.100101 | 0.122064 | 0.090772 | 0.419563 |  |

**Table A. 9** Duncan´s coefficients for TCOY

|  | **RW-NL** | **RW-L** | **AMP-W-NL** | **AMP-W-L** | **FA-W-NL** | **FA-W-L** | **FA+AMP-W-NL** | **FA+AMP-W-L** |
| --- | --- | --- | --- | --- | --- | --- | --- | --- |
| **RW-NL** |  | 0.009101 | 0.000040 | 0.000038 | 0.000029 | 0.000026 | 0.002345 | 0.000600 |
| **RW-L** | 0.009101 |  | 0.002037 | 0.002214 | 0.000684 | 0.000307 | 0.441660 | 0.153834 |
| **AMP-W-NL** | 0.000040 | 0.002037 |  | 0.979711 | 0.530377 | 0.302278 | 0.008415 | 0.032249 |
| **AMP-W-L** | 0.000038 | 0.002214 | 0.979711 |  | 0.523754 | 0.299170 | 0.009420 | 0.037791 |
| **FA-W-NL** | 0.000029 | 0.000684 | 0.530377 | 0.523754 |  | 0.637575 | 0.002907 | 0.012313 |
| **FA-W-L** | 0.000026 | 0.000307 | 0.302278 | 0.299170 | 0.637575 |  | 0.001248 | 0.005356 |
| **FA+AMP-W-NL** | 0.002345 | 0.441660 | 0.008415 | 0.009420 | 0.002907 | 0.001248 |  | 0.442817 |
| **FA+AMP-W-L** | 0.000600 | 0.153834 | 0.032249 | 0.037791 | 0.012313 | 0.005356 | 0.442817 |  |
